# Supplementary material for: Unveiling the Potential of Redox Chemistry to Form Size-Tunable, High-Index Silicon Particles
Source: PubMed Central journal article supplement (PMC11603531; doi:10.1021/acs.chemmater.4c01439), 2024-08-28
Supplement: cm4c01439_si_001.pdf [file cm4c01439_si_001.pdf]

## Supporting Information

### Unveiling the potential of redox chemistry to form size tunable, high index silicon particles

Megan A. Parker<sup>a</sup>, Safa Khaddad<sup>a</sup>, Nicolas Fares<sup>b</sup>, Anissa Ghoridi<sup>c</sup>, David Portehault<sup>c</sup>, Sébastien Bonhommeau<sup>d</sup>, Yacine Amarouchene<sup>b</sup>, Patrick Rosa<sup>a,\*</sup>, Mathieu Gonidec<sup>a,\*</sup>, Glenna L. Drisko<sup>a,\*</sup>

<sup>a</sup>Univ. Bordeaux, CNRS, Bordeaux-INP, ICMCB, UMR 5026, F-33600, Pessac, Fr

<sup>b</sup>Univ. Bordeaux, CNRS, LOMA, UMR 5798, F-33405, Talence, Fr

<sup>c</sup>Sorbonne Université, CNRS, LCMCP, F-75005 Paris, Fr

<sup>d</sup>Univ. Bordeaux, CNRS, Bordeaux-INP, ISM, UMR 5255, F-33400, Talence, Fr

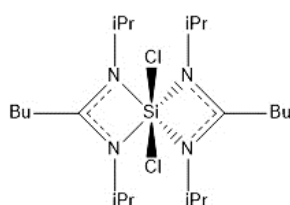

Figure S1. Molecular structure of bis(*N,N'*-diisopropylbutylamidinate) dichlorosilane. Referred to as  $\text{SiCl}_2[\text{BuC}(\text{N}^i\text{Pr})_2]_2$  throughout this publication.

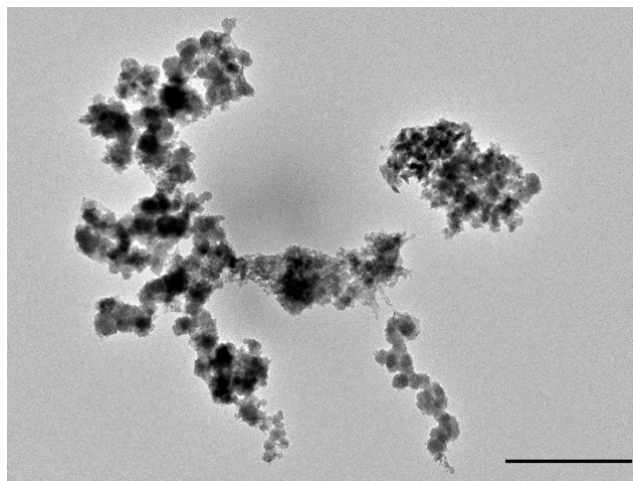

Figure S2. Particles produced when excess sodium silicide is reacted with  $\text{SiCl}_2[\text{BuC}(\text{N}^i\text{Pr})_2]_2$  in toluene (1.5 : 1 molar ratio). Scale bar represents 1  $\mu\text{m}$ .

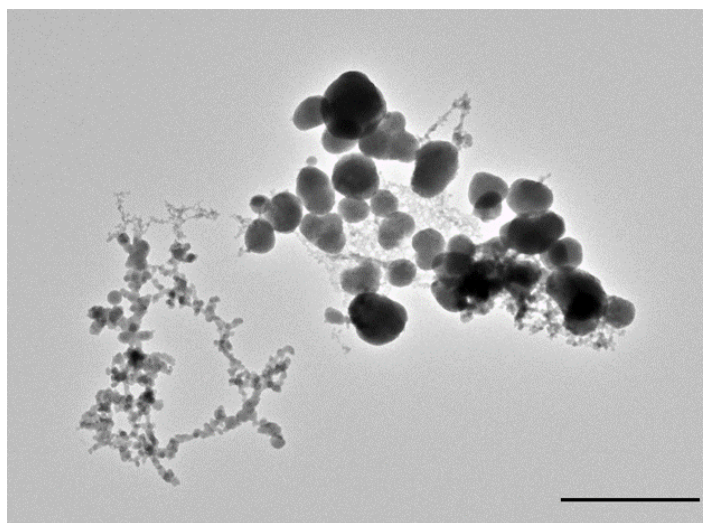

Figure S3. TEM image of particles formed when 5 molar eq.  $\text{SiCl}_2[\text{BuC}(\text{NiPr})_2]_2$  is reacted with 1 molar eq.  $\text{Na}_4\text{Si}_4$  in toluene for 16 hours. Scale bar represents  $1\ \mu\text{m}$ .

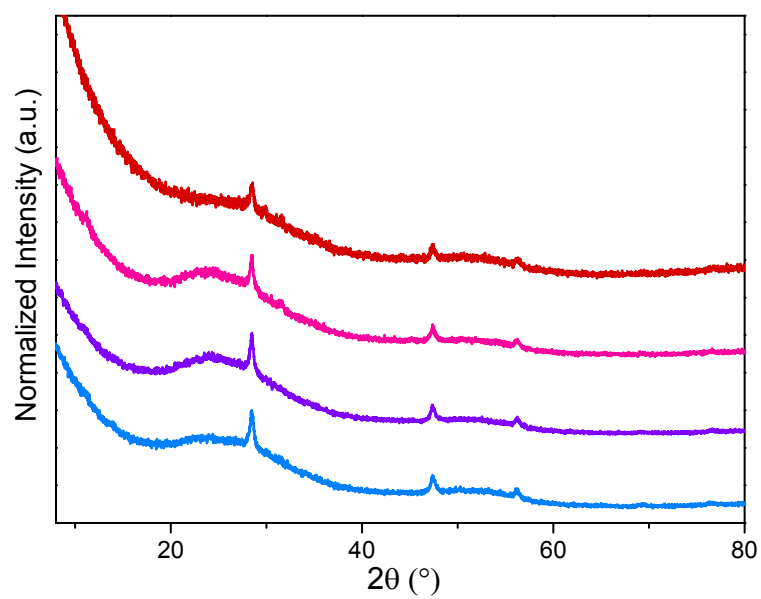

Figure S4. Powder X-ray diffractograms of particles produced when sodium silicide is reacted with  $\text{SiCl}_2[\text{BuC}(\text{NiPr})_2]_2$  in toluene for 16 hours with a (blue) 1:1:5 molar ratio, (purple) 1:2 ratio, (pink) 1:3 ratio, and (red) 1:4 ratio.

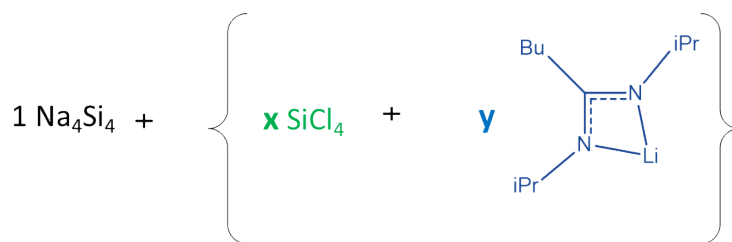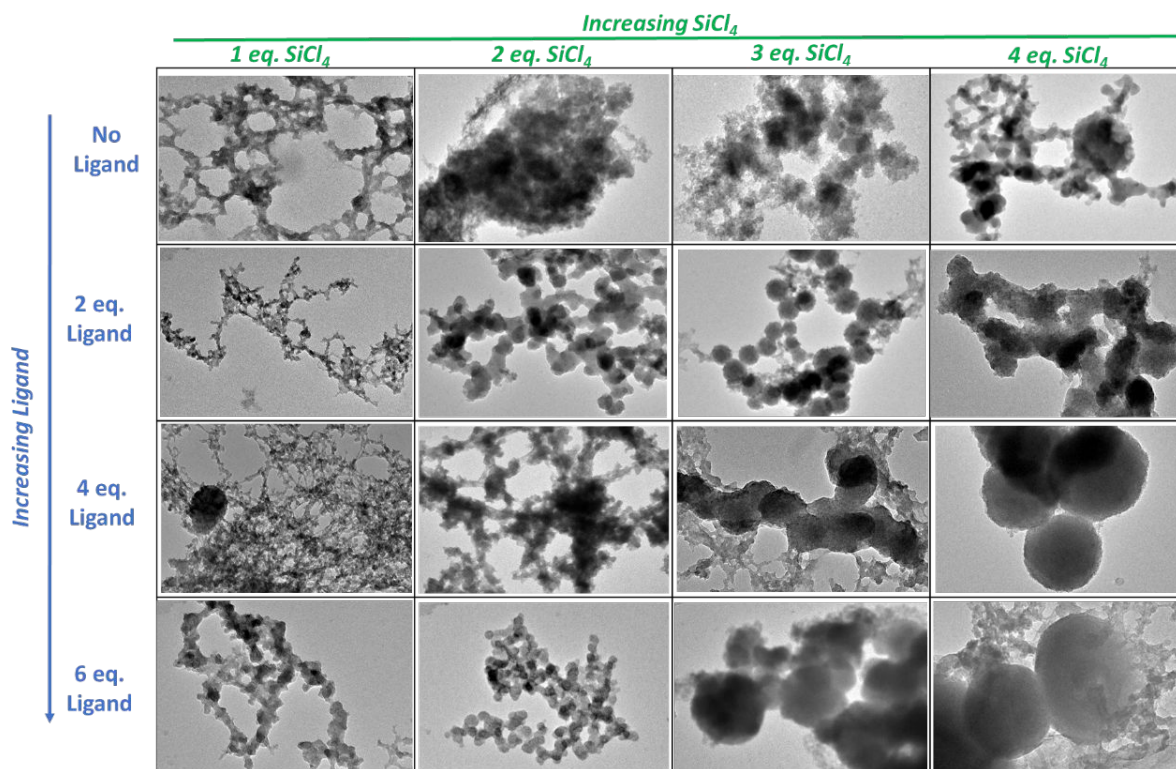

Figure S5. Additional experiments varying the quantity of Si (IV) species and ligand separately to a fixed quantity of  $\text{Na}_4\text{Si}_4$  in toluene and reacted for 16 hours. An overall reaction concentration of 20 mmol was maintained in all cases.

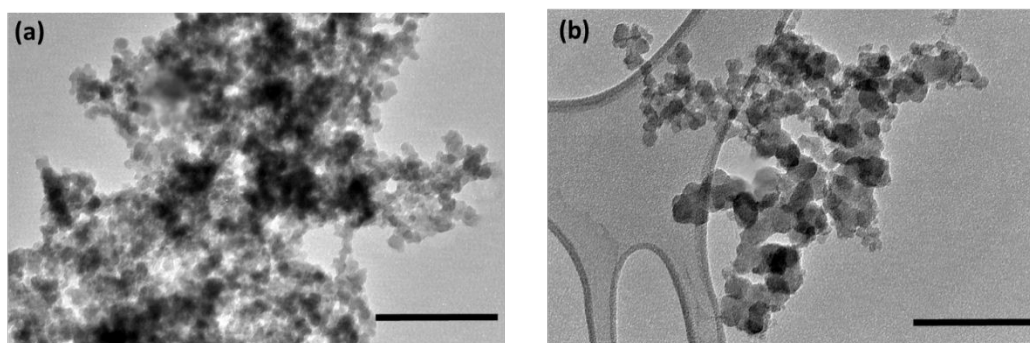

Figure S6. Growth experiments stopped early, (a) after 1 hour and (b) after 4 hours using 2 eq  $\text{SiCl}_2[\text{BuC}(\text{N}^i\text{Pr})_2]_2$  with 1 eq.  $\text{Na}_4\text{Si}_4$  in toluene. Scale bars represent 200 nm.

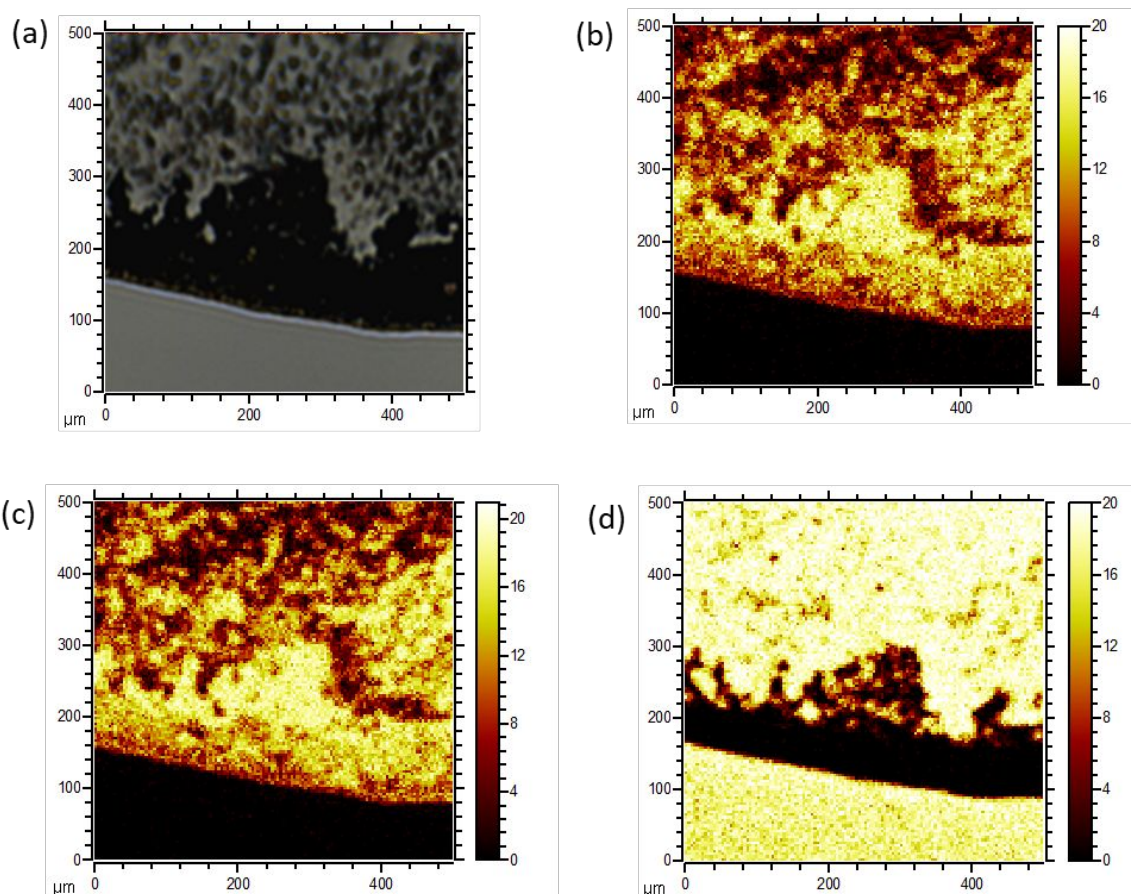

Figure S7. Optical image (a) and ToF-SIMS images of particles formed using  $n=2$  eq.  $\text{SiCl}_2[\text{BuC}(\text{N}^i\text{Pr})_2]_2$  corresponding to (b)  $m/z$  peak at 255, (c)  $m/z$  peak at 283, (d)  $m/z$  peak for Au.

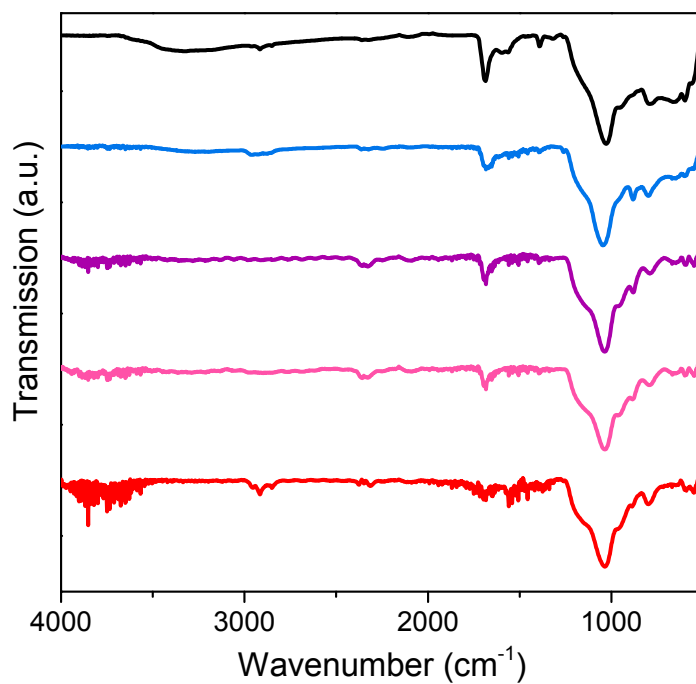

Figure S8. ATR-FTIR spectroscopy of particles produced when sodium silicide is reacted with  $\text{SiCl}_2[\text{BuC}(\text{N}^i\text{Pr})_2]_2$  in toluene for 16 hours with a (black) 1:1, (blue) 1:1:5, (purple) 1:2, (pink) 1:3, and (red) 1:4 molar ratio.

Table S1. Actual precursor quantities used to maintain 20 mmol concentration in 8 mL toluene.

| Molar Ratio | mg                                                   |                          |
|-------------|------------------------------------------------------|--------------------------|
|             | $\text{SiCl}_2[\text{BuC}(\text{N}^i\text{Pr})_2]_2$ | $\text{Na}_4\text{Si}_4$ |
| 1 : 1       | 37.4                                                 | 16.5                     |
| 1 : 1.5     | 44.3                                                 | 13.2                     |
| 1 : 2       | 49.9                                                 | 11.0                     |
| 1 : 3       | 54.5                                                 | 9.0                      |
| 1 : 4       | 59.9                                                 | 6.6                      |
| 1 : 5       | 62.4                                                 | 5.5                      |

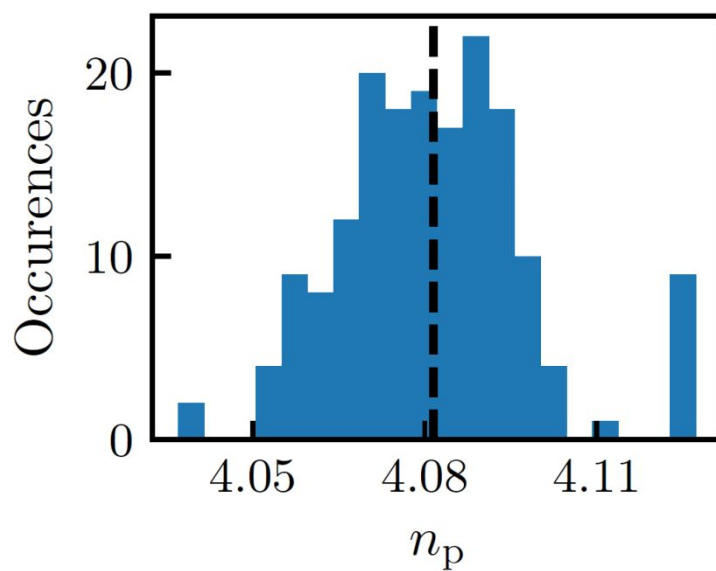

Figure S9. The distribution of measured indices computed from 170 interference pattern images, captured by a single particle formed using  $n=4$  eq.  $\text{SiCl}_2[\text{BuC}(\text{N}^i\text{Pr})_2]_2$ .
